# Supplementary material for: Practice and Challenges of Humanitarian Logistics Management Within the Ethiopian Public Pharmaceutical Supply Chain
Source: Research Square preprint supplement (doi:10.21203/rs.3.rs-5404660/v1), 2025-07-21
Supplement: Supplementary file 1 [file 6feef9579c45a373dd0fad7a.docx]

**Questionnaire**

**Consent**

Dear participant,

You have been selected to be part of this study and this is why I would like to interview you. This study is conducted by an MSc student at AAU for the fulfillment of a master’s degree in health supply chain management. The aim of the study is only to know Humanitarian Logistics Management Practice, Performances and Challenges of health commodities During Public Health Emergencies in MOH, EPSS and EPHI then to suppose improvement strategies.

**Confidentiality:** The information you provide will not be disclosed to anyone. It will only be used for research and academic purpose. Your name, address, and other personal information will be removed from the instrument, and only code will be used to connect your name and your answers without identifying you.

**Voluntary Participation:** Your participation is voluntary, and you can withdraw after having agreed to participate. You are free to refuse to answer any question asked in the questionnaire/interview guide. If you have any questions about this study, you can ask the principal investigator at the site or AAU School of Pharmacy, department of Health Supply Chain Management.

Name: Biniam Bahiru Tufa

Email Address: biniyam.bahiru@moh.gov.et

**Consent to participate:** Agreed in this consent indicates that you understand what will be expected of you and are willing to participate in this study.

Read by Participant Interviewer

Agreed__________________ Refused_________________

**Section I: Participant and organization information**

Please provide your answer by placing a tick in the boxes corresponding to your answer or write a full answer where appropriate.

| 1. Sex | Male Female |
| --- | --- |
| 1. Educational Level 2. Age in Range | First degree |
| Masters |
| PhD and above_________________ |
|  | 18-25 |
| 26-35 |
| 36-45 |
| ≥ 46 |
| 1. Area of Specialization | |
|  | Logistics and Supply chain management |
| Master of Business Administration |
| Pharmacy |
| Pharmaceutical Supply chain management |
| Others________________________ |
| 1. Place of Work | MOH EPSS EPHI |
|  |  |
| 1. Directorates or Teams | Forecasting and market shaping |
|  | Distribution and fleet management |
|  | Warehouse and inventory management |
|  | Contract and/or Tender Management |
|  | Other_________________________ |
| 1. Current Position in the Directorate or Team | |
|  | Coordinator or team leader |
|  | Director or deputy director |
|  | Senior officer |
|  | Others________________________ |
|  |  |
| 8. Work Experience | 1-5 years |
|  | 6-10 years |

|  | ≥ 10 years |
| --- | --- |

**Section II: Practices of Humanitarian Logistics Management at MOH, EPSS and EPHI**

Please read and respond to the following statements according to your experience, using the numbers 1-5 where, (1 =Very low extent, 2 = Low extent, 3 = Moderate extent, 4 = High extent, and 5 = Very high extent)

| 1. **Procurement practices** | **1** | **2** | **3** | **4** | **5** |
| --- | --- | --- | --- | --- | --- |
| My organization has built procurement strategy based on a preliminary need assessment |  |  |  |  |  |
| My organization has systems to quantify public health emergency pharmaceuticals |  |  |  |  |  |
| My organization considers a number of procurement options |  |  |  |  |  |
| Purchase orders placed and delivered on time and at a reasonable price in my organization |  |  |  |  |  |
| My organization appropriately manages in-kind donations and procured Pharmaceutical |  |  |  |  |  |
| My organization manage contracts and resolve challenges |  |  |  |  |  |
| 1. **Distribution practices** |  |  |  |  |  |
| My organization distribution hubs are well established to save operating costs |  |  |  |  |  |
| There exist an effective distribution management tool in my organization |  |  |  |  |  |
| There exist a timely distribution of pharmaceuticals in my organization |  |  |  |  |  |
| My organization distribution plans considers both demand and available stock |  |  |  |  |  |
| Central distribution facilities are used for the distribution in my organization |  |  |  |  |  |
| 1. **Warehousing practices** |  |  |  |  |  |
| There exist a sufficient and proper warehouse for temporary storage in my organization |  |  |  |  |  |
| Regular warehouse floor optimization and standardization is conducted in my organization |  |  |  |  |  |
| My organization warehouse is suitable for order processing |  |  |  |  |  |
| My organization warehouse strictly adheres to good pharmaceutical storage procedures |  |  |  |  |  |
| Tracking and tracing systems are used at the warehouse in my organization |  |  |  |  |  |
| 1. **Inventory management practice** |  |  |  |  |  |
| There exist prepositioning and optimal resource allocation in my organization |  |  |  |  |  |
| There is a practical supply and demand evaluation in my organization |  |  |  |  |  |
| There exist optimization of inventory turnover in my organization |  |  |  |  |  |
| There exist first-expire-first-out inventory management system in my organization |  |  |  |  |  |
| There exist reservation of a safety stock of pharmaceuticals in my organization |  |  |  |  |  |
| 1. **Transportation practices** |  |  |  |  |  |
| My organization considers the urgency of the demand in selection of mode of transportation |  |  |  |  |  |
| Pharmaceuticals transported to where they are needed rapidly in my organization |  |  |  |  |  |
| There exist partnership with 3rd party transportation organizations in my organization |  |  |  |  |  |
| Multiple transportation optimization techniques employed to reduce cost in my organization |  |  |  |  |  |
| Vehicles employed depending on the nature of pharmaceuticals in my organization |  |  |  |  |  |

**Section III: Challenges on Humanitarian Logistics Management Practices at MOH, EPSS and EPHI**

Which of the following challenges do you face while dealing with humanitarian logistics in your organization? Please read and indicate your level of agreement to the following statements according to your experience, using the numbers 1-5 where (1 = Very low extent, 2 = Low extent, 3 = Moderate extent, 4 = High extent, and 5 = Very high extent)

| **Challenges on Humanitarian logistics Management Practices** | | | | | |
| --- | --- | --- | --- | --- | --- |
| 1. **Economic challenges** | **1** | **2** | **3** | **4** | **5** |
| Lack of competent local transportation service providers |  |  |  |  |  |
| Lack of competent local pharmaceutical manufacturer/suppliers |  |  |  |  |  |
| Inadequate financing for logistic strategic preparedness |  |  |  |  |  |
| Lack of capacity to use of the obtained fund right away. |  |  |  |  |  |
| 1. **Environmental challenges** |  |  |  |  |  |
| Unsuitable topography; Facility location problem |  |  |  |  |  |
| Uncertainty in demand and supply |  |  |  |  |  |
| Limited access of essential logistics information between organizations |  |  |  |  |  |
| Lack of sufficient communications lines and infrastructures |  |  |  |  |  |
| 1. **Organizational challenges** |  |  |  |  |  |
| Inability to make decisions rather, other program staffs |  |  |  |  |  |
| Lack of adequate experience and familiarity |  |  |  |  |  |
| Role confusion between organizations |  |  |  |  |  |
| Limited coordination |  |  |  |  |  |
| 1. **Social challenges** |  |  |  |  |  |
| Lack of concerns for warehouse infrastructure |  |  |  |  |  |
| Cultural and linguistic barriers |  |  |  |  |  |
| Uncompetitive of market behavior in the local economy |  |  |  |  |  |
| High staff turnover among supply chain experts. |  |  |  |  |  |
| 1. **Technical challenges** |  |  |  |  |  |
| Low ICT utilization for supply chain efficiency improvement |  |  |  |  |  |
| Lack of joint logistics set up & implementation to reduce the lead time |  |  |  |  |  |
| Lack of partnership with 3rd party transportation organizations |  |  |  |  |  |
| Limited investment in adoption of ICT solutions |  |  |  |  |  |

**Interview Guide**

1. Could you describe your organization's role in public health emergency management?
2. What products do you manage during public health emergencies?
3. How would you describe your humanitarian logistics management practices?
4. What challenges does your organization face in logistics management during public health emergencies?
